# Supplementary material for: A chloroplast localized Ca2+-permeable channel regulates grain calcium accumulation in rice
Source: Research Square preprint supplement (doi:10.21203/rs.3.rs-3599419/v1), 2023-12-15
Supplement: Supplementary file 1 [file 3194f2e0c493dd54cce95900.xlsx]

## Sheet: Table S1
Supplementary Table 1. All candidate genes in QTL fine mapping region
Chromosome	MSU_Locus	End 5'	End 3'	Annotation
Chr3	LOC_Os03g26940	15404319	15408286	Expressed protein
Chr3	LOC_Os03g26960	15410432	15419602	Intron-binding protein aquarius, putative, expressed
Chr3	LOC_Os03g26970	15420148	15424724	Peptidase, T1 family, putative, expressed
Chr3	LOC_Os03g26980	15434488	15434174	Expressed protein
Chr3	LOC_Os03g26990	15436385	15437786	VQ domain containing protein, putative, expressed
Chr3	LOC_Os03g27003	15453264	15456412	Expressed protein
Chr3	LOC_Os03g27010	15460737	15463112	Expressed protein
Chr3	LOC_Os03g27019	15467831	15473842	Expressed protein
Chr3	LOC_Os03g27030	15478270	15475272	RNA recognition motif containing protein, expressed
Chr3	LOC_Os03g27040	15482139	15479743	Heavy metal-associated domain containing protein, expressed
Chr3	LOC_Os03g27050	15483411	15483803	Expressed protein
Chr3	LOC_Os03g27054	15487046	15487903	Expressed protein
Chr3	LOC_Os03g27060	15491594	15491391	Expressed protein
Chr3	LOC_Os03g27070	15493347	15493963	Expressed protein
Chr3	LOC_Os03g27080	15504379	15507731	Calmodulin-binding transcription activator 2, putative, expressed
Chr3	LOC_Os03g27090	15514115	15512510	MYB family transcription factor, putative, expressed

## Sheet: Table S2
Supplementary Table 2. Differentially expressed genes in the flag leaves of WT and gcsc1 at grain filling stage
Gene ID	WT-1_fpkm	WT-2_fpkm	WT-3_fpkm	gcsc1-1-1_fpkm	gcsc1-1-2_fpkm	gcsc1-1-3_fpkm	WT_mean	gcsc1-1_mean	log2(fc)	P_Value	FDR	Symbol	Description
Os11g0550800	0	0	0	17.912	16.395	11.857	0.001	15.388	13.9095	2.66e-16	1.22e-13	PSRP6	Similar to plastid-specific ribosomal protein 6
Os11g0243600	0	0	0	11.244	8.081	9.858	0.001	9.72767	13.2479	5.06e-15	2.03e-12	--	Hypothetical protein
MSTRG.23785	0	0	0	7.413	2.842	2.119	0.001	4.12467	12.0101	8.91e-10	1.98e-07	SORBIDRAFT_0019s002010	expressed protein, having alternative splicing products [Oryza sativa Japonica Group]
Os11g0439600	0	0	0	2.87	3.714	3.764	0.001	3.44933	11.7521	2.35e-14	8.47e-12	APY3	Similar to Nod factor binding lectin-nucleotide phosphohydrolase
MSTRG.7642	0	0	0	3.024	2.946	3.939	0.001	3.303	11.6896	1.88e-12	5.77e-10	--	Os08g0175900 [Oryza sativa Japonica Group]
Os11g0539600	0	0	0	2.208	2.509	3.369	0.001	2.69533	11.3962	6.96e-12	2.05e-09	--	Conserved hypothetical protein
MSTRG.1858	0	0	0	2.205	1.902	1.437	0.001	1.848	10.8517	9.05e-09	1.62e-06	--	Os01g0632300 [Oryza sativa Japonica Group]
MSTRG.1717	0	0	0	1.8	1.754	1.927	0.001	1.827	10.8353	4.53e-08	7.14e-06	--	Os01g0607050 [Oryza sativa Japonica Group]
Os11g0440200	0	0	0	2.134	0.58	1.933	0.001	1.549	10.5971	5.55e-08	8.57e-06	APY3	Similar to GDA1/CD39 family protein, expressed
Os04g0131850	0	0	0	1.637	1.588	1.172	0.001	1.46567	10.5173	3.62e-08	5.8e-06	UGT80A2	Similar to UDP-glucose:sterol glucosyltransferase
Os01g0607100	0	0	0	1.371	1.561	1.18	0.001	1.37067	10.4207	7.82e-08	1.15e-05	--	Bifunctional inhibitor/plant lipid transfer protein/seed storage domain containing protein
Os08g0332100	0	0	0	0.927	1.415	1.512	0.001	1.28467	10.3272	1.92e-09	4.05e-07	--	Conserved hypothetical protein
MSTRG.7135	0	0	0	1.205	0.622	1.586	0.001	1.13767	10.1519	7.03e-06	0.000588195	--	Os12g0221400, partial [Oryza sativa Japonica Group]
Os01g0703000	0	0	0	1.296	1.129	0.434	0.001	0.953	9.89633	6.18e-08	9.41e-06	SPS5	Similar to Poly(A) polymerase gamma (EC 2.7.7.19) (PAP gamma) (Polynucleotide adenylyltransferase gamma) (SRP RNA 3' adenylating enzyme)
Os08g0330800	0	0	0	0.864	1.2	0.591	0.001	0.885	9.78953	9.22e-06	0.000738778	--	Conserved hypothetical protein
Os03g0282232	0	0	0	0.928	0.905	0.673	0.001	0.835333	9.70621	0.000769531	0.0240117	--	Conserved hypothetical protein
Os08g0290900	0	0	0	0.621	0.68	1.096	0.001	0.799	9.64205	1.62e-07	2.19e-05	--	Similar to DNA-directed RNA polymerase III subunit 22.9 kDa polypeptide
Os11g0550500	0.015	0	0.017	7.694	8.988	7.173	0.0106667	7.95167	9.542	1.57e-20	9.45e-18	RGA5	Similar to LZ-NBS-LRR class RGA
Os11g0490251	0	0	0	0.062	0.726	1.322	0.001	0.703333	9.45806	0.000102832	0.00523318	--	Hypothetical protein
MSTRG.12012	0	0.019	0.047	14.352	13.751	16.926	0.022	15.0097	9.41417	3.67e-31	4.24e-28	--	Os08g0430050, partial [Oryza sativa Japonica Group]
Os02g0734400	0	0	0	0.855	0.432	0.736	0.001	0.674333	9.39732	0.0001741	0.00797404	PXG4	Similar to ABA-induced protein
Os07g0457200	0	0	0	0.484	0.413	0.853	0.001	0.583333	9.18818	5.27e-07	6.21e-05	--	Hypothetical protein
Os12g0121600	0	0	0	0.715	0.255	0.367	0.001	0.445667	8.79982	1.97e-07	2.58e-05	CHX15	Cation/H+ exchanger domain containing protein
Os11g0550100	0.028	0	0	3.015	2.962	2.28	0.00933333	2.75233	8.20405	3.48e-11	9.47e-09	RGA5	Similar to NB-ARC domain containing protein, expressed
MSTRG.12182	0	0	0.023	2.185	2.485	1.96	0.00766667	2.21	8.17123	1.24e-11	3.52e-09	--	expressed protein [Oryza sativa Japonica Group]
MSTRG.18764	0.326	0.176	0.417	92.803	88.086	80.802	0.306333	87.2303	8.15358	4.76e-232	1.37e-227	--	Os11g0506000 [Oryza sativa Japonica Group]
Os12g0182900	0	0.047	0	4.289	4.584	3.222	0.0156667	4.03167	8.00753	5.49e-15	2.17e-12	--	Conserved hypothetical protein
MSTRG.25432	0	0.214	0.052	22.967	26.736	17.829	0.0886667	22.5107	7.988	4.35e-34	5.98e-31	--	Os01g0862900 [Oryza sativa Japonica Group]
Os08g0192100	0	0	0.091	5.522	6.143	5.686	0.0303333	5.78367	7.57494	6.36e-10	1.43e-07	--	Hypothetical conserved gene
Os04g0397800	0.06	0	0	1.99	4.547	2.212	0.02	2.91633	7.18801	7.19e-09	1.31e-06	--	Conserved hypothetical protein
MSTRG.14737	0.115	0.058	0.028	9.564	7.984	11.095	0.067	9.54767	7.15484	6.29e-39	1.3e-35	--	Os04g0225400 [Oryza sativa Japonica Group]
Os04g0120100	0.077	0	0.086	7.394	5.259	6.086	0.0543333	6.24633	6.84503	1.62e-10	4.06e-08	SBT3.16	Similar to H0716A07.11 protein
Os06g0318533	0.062	0	0	2.753	1.404	2.806	0.0206667	2.321	6.8113	2.71e-07	3.36e-05	--	Conserved hypothetical protein
MSTRG.5979	0	0.174	0	6.62	6.075	4.641	0.058	5.77867	6.63854	1.64e-14	6.24e-12	--	Os09g0284250, partial [Oryza sativa Japonica Group]
Os11g0523110	0.039	0	0.044	2.783	3.14	2.069	0.0276667	2.664	6.5893	1.23e-09	2.69e-07	TS2	Similar to Alcohol dehydrogenase-like protein
Os08g0265000	0.235	0.084	0.244	13.368	14.674	11.824	0.187667	13.2887	6.14588	1.79e-91	1.72e-87	--	Hypothetical gene
Os11g0550900	0	0.114	0.074	4.115	4.844	4.277	0.0626667	4.412	6.13759	2.76e-19	1.53e-16	--	Conserved hypothetical protein
Os03g0223301	0.122	0.177	0.207	11.107	11.006	10.18	0.168667	10.7643	5.99594	3.49e-49	1.01e-45	--	Hypothetical gene
Os03g0282300	0	0	0.039	0.036	1.137	0.834	0.013	0.669	5.68542	0.000179015	0.00812093	--	Hypothetical conserved gene
Os01g0644500	0.094	0.018	0.009	3.272	0.087	2.55	0.0403333	1.96967	5.60984	0.00150378	0.0398452	--	Hypothetical conserved gene
MSTRG.18493	0.203	0.109	0.793	24.072	15.912	13.56	0.368333	17.848	5.59861	1.63e-23	1.21e-20	--	far-red impaired response-like protein [Oryza sativa Japonica Group]
Os01g0302100	0.054	0.031	0	1.023	1.061	1.315	0.0283333	1.133	5.3215	2.49e-08	4.13e-06	--	Conserved hypothetical protein
MSTRG.23875	0.12	0.035	0.051	2.671	2.809	2.217	0.0686667	2.56567	5.22358	2.32e-28	2.31e-25	--	Os07g0152301, partial [Oryza sativa Japonica Group]
Os02g0737801	0.056	0	0.127	2.136	2.199	1.494	0.061	1.943	4.99333	1.55e-22	1.06e-19	--	Similar to Pentatricopeptide repeat protein
Os10g0432200	0.035	0.491	0.348	8.794	8.067	8.915	0.291333	8.592	4.88225	5.89e-09	1.1e-06	RE1	Conserved hypothetical protein
MSTRG.3541	0.194	0.216	0.088	5.164	3.106	5.247	0.166	4.50567	4.76249	2.62e-13	8.7e-11	--	Os07g0137500, partial [Oryza sativa Japonica Group]
Os09g0418375	0	0	0.097	1.265	1.116	0.251	0.0323333	0.877333	4.76203	0.000648635	0.0214014	--	Hypothetical protein
MSTRG.3960	0.131	0.228	0	2.821	3.865	2.786	0.119667	3.15733	4.72161	4.15e-17	2.07e-14	GH3.12	Os10g0181466 [Oryza sativa Japonica Group]
Os08g0205175	0.077	0	0	0.78	0.879	0.368	0.0256667	0.675667	4.71834	5.45e-07	6.37e-05	--	Hypothetical protein
Os08g0205150	0	0.159	0.172	2.218	2.721	3.502	0.110333	2.81367	4.67251	1.22e-06	0.000133429	RGA5	NB-ARC domain containing protein
MSTRG.14771	0.228	0.274	0.389	6.02	6.78	5.299	0.297	6.033	4.34434	6.99e-20	4.04e-17	--	Os09g0284250, partial [Oryza sativa Japonica Group]
Os12g0183375	0.075	0	0.097	1.164	1.229	1.053	0.0573333	1.14867	4.32444	0.000388747	0.0147016	-	-
Os12g0143800	0.288	0.334	0.081	3.992	4.822	3.722	0.234333	4.17867	4.15641	1.87e-20	1.1e-17	DMC1A	Meiosis-specific DNA recombinase, Synaptonemal complex (SC) assembl
Os04g0168300	0.491	1.593	0.554	16.822	14.355	13.524	0.879333	14.9003	4.08279	1.54e-24	1.2e-21	--	Conserved hypothetical protein
Os11g0691100	0	0	0.214	1.8	0.267	1.089	0.0713333	1.052	3.88241	0.000249951	0.0104526	WAK3	Similar to Protein kinase
Os06g0626466	0.03	0	0.067	0.455	0.669	0.305	0.0323333	0.476333	3.88088	0.000463635	0.0167646	--	Hypothetical conserved gene
MSTRG.25459	0.333	0.129	0.367	3.573	2.894	4.203	0.276333	3.55667	3.68604	3.75e-10	8.72e-08	--	Os07g0106700, partial [Oryza sativa Japonica Group]
Os04g0249600	1.024	1.412	0.738	13.084	14.907	12.051	1.058	13.3473	3.65714	8.36e-35	1.51e-31	STR18	Similar to senescence-associated protein DIN1
Os04g0107200	0	0.052	0.151	0.639	0.751	1.021	0.0676667	0.803667	3.57008	0.000292766	0.0118316	HPR3	NAD(P)-binding domain containing protein
Os03g0226300	0.642	0.682	0.362	5.025	7.856	6.502	0.562	6.461	3.52312	3.62e-33	4.54e-30	At2g41970	Similar to Pto kinase interactor 1
Os11g0308432	0.154	0.179	0.152	1.545	2.084	1.81	0.161667	1.813	3.48728	1.68e-16	8.09e-14	--	Hypothetical conserved gene
MSTRG.14438	0.177	0.288	0.224	6.045	0.804	0.873	0.229667	2.574	3.4864	0.000241345	0.0101516	--	OSIGBa0145N07.3 [Oryza sativa]
Os01g0165800	0.812	2.072	1.397	13.383	14.053	12.438	1.427	13.2913	3.21943	1.11e-49	3.74e-46	PAIR2	DNA-binding HORMA domain containing protein
Os09g0418500	0.124	0	0.033	0.602	0.133	0.619	0.0523333	0.451333	3.10839	0.000750827	0.0235747	CIPK27	Similar to CBL-interacting protein kinase 14
Os05g0425600	0	0.04	0.157	0.713	0.273	0.665	0.0656667	0.550333	3.06707	0.00202953	0.0499677	--	Hypothetical protein
Os04g0118800	0	0.056	0.126	0.559	0.342	0.582	0.0606667	0.494333	3.02651	3.31e-05	0.00209571	RPM1	NB-ARC domain containing protein
MSTRG.2207	0.591	1.505	0.101	7.203	5.068	3.133	0.732333	5.13467	2.8097	8.48e-08	1.22e-05	--	hypothetical protein [Oryza sativa Japonica Group]
Os11g0133001	0.06	0.046	0.067	0.446	0.357	0.399	0.0576667	0.400667	2.79659	0.000329046	0.0129003	PK1	Similar to Ser/Thr protein kinase (Fragment)
Os03g0115800	0.246	0.204	0.177	1.231	1.346	1.408	0.209	1.32833	2.66804	3.98e-06	0.000369121	--	Conserved hypothetical protein
Os06g0597250	3.401	4.561	3.799	21.218	23.296	25.78	3.92033	23.4313	2.57939	5.51e-60	3.18e-56	--	Similar to B protein
Os12g0554100	0.403	0.067	0.216	1.358	0.928	1.707	0.228667	1.331	2.54119	1.95e-07	2.56e-05	TBL14	Conserved hypothetical protein
Os02g0216400	0.165	0.574	0	1.072	1.237	1.893	0.246333	1.40067	2.50743	0.00109362	0.0314933	--	Conserved hypothetical protein
Os08g0496700	0.283	0.723	0.32	2.386	2.615	2.441	0.442	2.48067	2.48861	2.06e-06	0.000216452	--	Myb/SANT-like domain domain containing protein
Os03g0791700	0.097	0	0.179	0.563	0.281	0.682	0.092	0.508667	2.46701	0.00056051	0.0191857	At3g03770	Tyrosine protein kinase domain containing protein
Os07g0176600	0.091	0.026	0.231	0.468	0.692	0.611	0.116	0.590333	2.34741	0.000693445	0.022307	NEK3	Serine/threonine protein kinase, Never-in-mitosis A (NIMA)-related kinase, Pollen germinatio
Os03g0569000	0.181	0.3	0.234	0.744	1.777	0.991	0.238333	1.17067	2.29628	1.18e-05	0.00091391	--	Conserved hypothetical protein
MSTRG.19823	3.208	4.447	6.938	21.01	23.607	22.135	4.86433	22.2507	2.19353	1.79e-34	2.87e-31	--	Os09g0389000 [Oryza sativa Japonica Group]
MSTRG.22745	1.328	1.28	1.822	6.144	7.254	6.808	1.47667	6.73533	2.18941	9.74e-41	2.34e-37	RE2	PH01B001I13.11 [Phyllostachys edulis]
Os02g0157200	0.07	0.298	0.079	0.575	0.84	0.536	0.149	0.650333	2.12587	0.00108731	0.0314057	--	Leucine-rich repeat domain containing protein
Os08g0266600	0.738	0.544	0.946	3.615	3.132	2.921	0.742667	3.22267	2.11747	3.29e-10	7.86e-08	NUP43	WD40/YVTN repeat-like domain containing protein
MSTRG.1154	1.015	0.597	0.75	4.003	3.542	2.469	0.787333	3.338	2.08394	3.82e-13	1.25e-10	--	zinc knuckle containing protein-like [Oryza sativa Japonica Group]
Os06g0191900	0.143	0.198	0.355	1.232	0.575	1.137	0.232	0.981333	2.08062	3.5e-05	0.00218957	--	Similar to Serine threonine kinase
Os09g0256700	0.687	1.395	0.872	7.055	2.513	2.466	0.984667	4.01133	2.02637	0.000172094	0.00791989	--	Conserved hypothetical protein
Os09g0298200	1.81	2.048	2.736	10.569	7.182	8.625	2.198	8.792	2	1.93e-21	1.19e-18	AGPS1	Similar to Brittle 2
Os07g0235200	0.282	0.2	0.106	1.127	0.635	0.495	0.196	0.752333	1.94052	0.000119753	0.00591692	AHL20	Protein of unknown function DUF296 domain containing protein
Os01g0692400	1.288	2.104	1.321	6.069	6.85	5.098	1.571	6.00567	1.93464	2.16e-09	4.52e-07	--	Conserved hypothetical protein
Os08g0358050	1.077	0.63	1.226	4.158	3.28	3.404	0.977667	3.614	1.88618	4.48e-07	5.32e-05	-	-
Os02g0780500	0.237	0.289	0.178	0.782	1.065	0.741	0.234667	0.862667	1.87819	1.36e-06	0.000147043	SRL2	Conserved hypothetical protein
Os06g0192000	0.151	0.897	0.215	1.648	1.884	1.076	0.421	1.536	1.86729	0.00025276	0.0105092	--	Hypothetical gene
Os09g0401600	1.802	0.649	0.977	5.005	3.837	3.637	1.14267	4.15967	1.86406	2.54e-05	0.00169035	PUX2	Similar to PUX2 (PLANT UBX DOMAIN-CONTAINING PROTEIN 2); nucleic acid binding / zinc ion binding
Os12g0637300	3.166	4.234	3.656	13.811	13.314	12.658	3.68533	13.261	1.84732	2.8e-33	3.67e-30	--	Conserved hypothetical protein
Os12g0185900	0.419	0.27	0.525	1.302	1.424	1.381	0.404667	1.369	1.75832	1.87e-09	3.96e-07	--	Similar to Zinc knuckle family protein
Os10g0541800	1.244	0.455	0.665	2.285	4.051	1.441	0.788	2.59233	1.71798	0.00158398	0.0413254	-	-
Os01g0633400	0.73	1.113	1.343	2.996	4.234	3.124	1.062	3.45133	1.70037	3.16e-07	3.87e-05	KING1	Cystathionine beta-synthase, core domain containing protein
Os04g0280200	6.469	6.579	7.024	21.905	21.889	20.034	6.69067	21.276	1.66901	3.08e-56	1.27e-52	udkC	Hypothetical conserved gene
Os10g0164500	0.44	0.146	0.709	1.613	1.025	1.353	0.431667	1.33033	1.6238	0.00122911	0.0342666	CYP76B6	Similar to Cytochrome P450 family protein, expressed
Os09g0420900	1.146	0.793	1.27	3.653	2.511	3.675	1.06967	3.27967	1.61639	7.82e-10	1.75e-07	NPY1	BTB domain containing protein
Os08g0247700	3.831	2.299	2.161	4.106	8.316	12.539	2.76367	8.32033	1.59006	0.00056899	0.0194298	--	Protein kinase, catalytic domain domain containing protein
Os11g0257800	1.149	1.588	0.738	3.411	2.996	3.507	1.15833	3.30467	1.51245	3.8e-06	0.000354873	--	Hypothetical protein
Os01g0872900	2.422	1.482	2.124	6.421	4.2	6.05	2.00933	5.557	1.46759	1.69e-08	2.89e-06	--	Protein of unknown function DUF635 family protein
Os01g0628700	2.756	3.452	2.692	9.269	8.61	6.381	2.96667	8.08667	1.4467	1.03e-13	3.48e-11	CYP72A11	Cytochrome P450
Os01g0357100	21.326	26.122	22.22	65.211	77.699	46.629	23.2227	63.1797	1.44393	4.33e-25	3.68e-22	--	Ferredoxin-nitrite reductase, Nitrate reduction (assimilation), Determination of regeneration abilit
Os06g0179000	0.806	0.633	0.586	1.254	2.252	1.915	0.675	1.807	1.42064	7.21e-05	0.00390919	--	Glycoside hydrolase family 79, N-terminal protein
Os01g0873000	8.712	10.207	7.655	29.462	18.16	23.431	8.858	23.6843	1.41888	1.38e-10	3.52e-08	--	Hypothetical conserved gene
Os07g0179300	2.028	3.821	4.404	15.248	4.678	7.472	3.41767	9.13267	1.41802	4.2e-05	0.00256333	ARSM2	Methyltransferase type 11 domain containing protein
Os12g0183100	117.06	88.147	79.906	242.562	263.441	251.718	95.0377	252.574	1.41013	3.66e-37	7.05e-34	--	Similar to Branched chain alpha-keto acid dehydrogenase E1-alpha subunit (Fragment)
Os04g0118700	1.037	1.202	0.872	2.903	2.631	2.725	1.037	2.753	1.40859	6.23e-09	1.15e-06	PCMP-H81	Pentatricopeptide repeat domain containing protein
Os11g0126900	0.518	0.883	0.653	2.117	2.468	0.864	0.684667	1.81633	1.40756	0.000968058	0.0288269	NAM-B1	NAC-domain protein, Drought toleranc
Os07g0679400	1.635	1.302	1.211	5.135	3.981	1.868	1.38267	3.66133	1.40492	8.81e-06	0.000712408	--	Conserved hypothetical protein
Os09g0347300	0.44	0.349	0.6	1.164	1.302	1.196	0.463	1.22067	1.39859	0.00028912	0.0117121	EXO70A1	Exo70 exocyst complex subunit family protein
Os04g0116200	1.925	2.079	3.109	5.432	9.548	3.6	2.371	6.19333	1.38522	1.45e-05	0.00107559	--	Protein of unknown function DUF827, plant family protein
Os07g0456400	19.856	18.34	18.981	48.866	50.536	49.237	19.059	49.5463	1.37831	8.52e-57	4.1e-53	LUC7L3	LUC7 related family protein
Os06g0273400	1.788	3.135	3.413	6.585	8.512	6.511	2.77867	7.20267	1.37414	4.31e-09	8.57e-07	--	Hypothetical protein
Os05g0160300	2.851	3.48	2.37	9.165	3.714	9.334	2.90033	7.40433	1.35215	0.00011728	0.00584474	--	Bifunctional inhibitor/plant lipid transfer protein/seed storage domain containing protein
Os04g0101400	0.58	0.672	0.622	1.548	1.632	1.499	0.624667	1.55967	1.32008	0.000328537	0.0128979	CYP93G1	Flavone synthase II (FNSII), Biosynthesis of tricin O-linked conjugate
Os12g0179800	12.869	13.644	15.007	33.052	33.068	35.059	13.84	33.7263	1.28503	3.84e-34	5.54e-31	SRT2	NAD-dependent histone deacetylase, silent information regulator Sir2 domain containing protein
Os11g0274100	0.782	0.862	1.589	2.69	3.169	1.947	1.07767	2.602	1.27171	0.000536314	0.0185271	CRK14	Similar to Protein kinase domain containing protein, expressed
Os07g0457300	3.315	3.381	4.307	7.967	8.591	9.876	3.66767	8.81133	1.2645	9.88e-16	4.25e-13	--	Protein of unknown function DUF1446 family protein
Os06g0273500	2.841	3.57	3.451	7.196	8.371	7.997	3.28733	7.85467	1.25663	8.68e-12	2.53e-09	TBL21	Protein of unknown function DUF231, plant domain containing protein
Os01g0787400	10.706	7.716	9.302	23.71	22.734	19.52	9.24133	21.988	1.25054	2.8e-15	1.15e-12	--	Conserved hypothetical protein
MSTRG.4220	1.257	1.027	1.162	3.298	3.106	1.794	1.14867	2.73267	1.25035	5.84e-06	0.000502896	--	Os10g0387100 [Oryza sativa Japonica Group]
Os04g0121100	4.45	4.304	4.557	12.924	7.361	10.322	4.437	10.2023	1.20124	4.94e-11	1.31e-08	SBT3.9	Similar to OSIGBa0115D20.4 protein
Os08g0396500	1.426	1.248	1.7	3.259	3.754	2.91	1.458	3.30767	1.18182	2.31e-06	0.000238476	--	Hypothetical conserved gene
Os07g0414000	3.161	4.123	4.197	9.598	8.558	7.657	3.827	8.60433	1.16885	5.37e-10	1.22e-07	3MAT	Transferase domain containing protein
Os12g0508400	1.716	3.222	2.766	5.621	3.954	7.743	2.568	5.77267	1.16859	0.00106063	0.030909	--	Conserved hypothetical protein
Os08g0507702	4.566	3.875	3.659	9.12	9.326	8.658	4.03333	9.03467	1.1635	1.81e-12	5.6e-10	CYP76M5	Cytochrome P450 family protein
MSTRG.9444	0.888	0.772	1.18	2.213	2.354	1.76	0.946667	2.109	1.15563	0.00051147	0.0179543	--	retrotransposon protein-like [Oryza nivara]
MSTRG.10551	5.156	4.816	2.827	10.953	8.138	9.389	4.26633	9.49333	1.15392	1.65e-05	0.00119724	NOI4	protein NOI4 [Oryza sativa Japonica Group]
Os04g0480900	5.28	5.389	5.899	10.968	13.046	12.836	5.52267	12.2833	1.15327	2.2e-17	1.13e-14	--	Glycoside hydrolase, family 5 protein
Os07g0413800	121.652	131.098	96.77	284.533	247.691	234.383	116.507	255.536	1.13311	2.37e-23	1.71e-20	CDI	Conserved hypothetical protein
Os08g0507701	4.661	2.464	2.218	5.708	6.76	7.98	3.11433	6.816	1.13	8.79e-06	0.000712408	--	Hypothetical protein
MSTRG.6606	2.139	2.976	2.635	5.134	6.553	5.227	2.58333	5.638	1.12595	2.36e-07	3.01e-05	ATG8D	Os07g0653366 [Oryza sativa Japonica Group]
Os10g0494800	7.349	7.64	8.051	13.98	17.928	18.139	7.68	16.6823	1.11914	1.01e-21	6.64e-19	--	Katanin regulatory subunit P80a, Microtubule stabilizer, Root growth via regulating the cell elongation and divisio
Os08g0474800	4.385	2.571	4.491	9.259	6.01	9.356	3.81567	8.20833	1.10515	1.45e-05	0.00107295	--	Conserved hypothetical protein
Os06g0483200	0.563	0.495	0.712	1.315	0.874	1.579	0.59	1.256	1.09005	4.74e-05	0.00280807	--	Similar to cycloartenol synthase
Os08g0203800	1.009	0.936	0.878	1.865	2.433	1.683	0.941	1.99367	1.08316	0.000688934	0.0222262	--	Cyclin-like F-box domain containing protein
Os01g0778900	5.269	4.751	2.972	11.617	9.002	6.162	4.33067	8.927	1.04359	0.00103789	0.0304972	--	Similar to serine-rich protein-related
Os08g0338000	6.547	5.271	5.71	12.009	11.561	12.414	5.84267	11.9947	1.03769	1.67e-12	5.22e-10	--	Antihaemostatic protein domain containing protein
Os12g0570700	25.006	19.165	26.314	33.417	63.821	46.411	23.495	47.883	1.02716	8.23e-09	1.49e-06	MT4A	Similar to Metallothionein-like protein type 1
Os03g0280400	19.576	12.491	11.2	31.873	23.53	32.68	14.4223	29.361	1.0256	1.43e-07	1.98e-05	--	Similar to plant-specific domain TIGR01589 family protein
Os02g0204400	4.223	4.896	5.649	12.602	8.757	8.429	4.92267	9.92933	1.01226	7.81e-08	1.15e-05	UVR3	Similar to (6-4)DNA photolyase
Os03g0793000	5.324	4.267	3.855	10.052	7.987	8.868	4.482	8.969	1.0008	2.12e-05	0.00146963	SAP7	Zinc finger, AN1-type domain containing protein
Os02g0461900	7.707	7.406	7.919	2.855	3.455	5.193	7.67733	3.83433	-1.00163	0.00154214	0.0404803	--	Similar to actin associated protein
Os02g0823100	36.077	54.734	74.96	29.451	27.72	25.553	55.257	27.5747	-1.00281	5.27e-06	0.00045784	PIP1-3	Similar to Plasma membrane intrinsic protein (Plasma membrane integral protein ZmPIP1-5)
Os06g0674000	3.505	4.172	5.979	2.451	2.722	1.637	4.552	2.27	-1.00381	7.13e-05	0.00389078	--	Conserved hypothetical protein
Os07g0605400	32.148	38.125	24.033	14.634	19.676	12.677	31.4353	15.6623	-1.00509	2.19e-05	0.00150957	Ea1	Similar to EGG APPARATUS-1 protein (ZmEA1)
Os02g0111600	3.655	4.465	8.018	3.008	3.037	1.985	5.37933	2.67667	-1.00699	0.00193641	0.0481268	WAK5	Serine/threonine protein kinase-related domain containing protein
Os12g0431100	10.318	5.909	12.27	5.072	5.175	3.926	9.499	4.72433	-1.00766	0.000415925	0.0155058	AATP1	ATPase, AAA-type, core domain containing protein
Os08g0332700	45.91	51.73	50.028	26.842	22.666	23.687	49.2227	24.3983	-1.01254	2.08e-14	7.6e-12	--	Conserved hypothetical protein
Os01g0532300	10.904	11.732	11.647	6.868	5.205	4.901	11.4277	5.658	-1.01417	2.13e-05	0.00147565	--	Conserved hypothetical protein
Os01g0673500	25.076	32.941	25.333	13.373	14.928	12.775	27.7833	13.692	-1.02089	6.11e-11	1.59e-08	Katnal2	Similar to predicted protein
Os10g0142600	8.745	13.317	13.547	4.646	8.523	4.302	11.8697	5.82367	-1.02728	0.000224274	0.00958852	WAKL20	Protein kinase, catalytic domain domain containing protein
Os11g0661800	4.898	6.471	6.489	3.069	3.781	1.907	5.95267	2.919	-1.02806	0.000571678	0.0194755	--	Concanavalin A-like lectin/glucanase domain containing protein
Os06g0165800	30.065	29.797	40.782	16.339	18.396	14.591	33.548	16.442	-1.02884	1.75e-08	2.98e-06	CCOAOMT1	Similar to Caffeoyl-CoA 3-O-methyltransferase (Fragment)
Os03g0132900	153.592	149.315	221.311	86.65	104.79	65.39	174.739	85.61	-1.02935	2.09e-08	3.48e-06	Cht11	Similar to Chitinase 11
Os02g0228300	83.548	92.002	146.73	51.507	61.423	44.374	107.427	52.4347	-1.03476	0.00149307	0.0396159	RLK5	Protein kinase, core domain containing protein
Os11g0661900	4.083	4.304	4.644	1.697	2.885	1.776	4.34367	2.11933	-1.0353	0.00133481	0.036439	--	Conserved hypothetical protein
Os03g0757000	5.705	11.612	10.933	4.789	5.209	3.727	9.41667	4.575	-1.04144	0.000646628	0.0213973	UGT83A1	UDP-glucuronosyl/UDP-glucosyltransferase domain containing protein
Os02g0135200	4.469	6.256	9.597	3.083	3.964	2.821	6.774	3.28933	-1.04221	0.000201601	0.00885417	MPK13	Similar to Mitogen-activated protein kinase 13
Os07g0407700	7.094	7.718	8.946	4.067	3.949	3.511	7.91933	3.84233	-1.0434	0.000155689	0.0073166	--	Hypothetical conserved gene
Os08g0498100	47.502	51.454	69.321	31.561	28.555	21.476	56.0923	27.1973	-1.04434	6.03e-08	9.26e-06	ROMT-15	Similar to Caffeoyl-CoA O-methyltransferase 2 (EC 2.1.1.104) (Trans-caffeoyl-CoA 3-O-methyltransferase 2) (CCoAMT-2) (CCoAOMT-2)
Os12g0266200	3.839	4.216	3.731	1.51	2.498	1.705	3.92867	1.90433	-1.04475	0.00182687	0.0460791	WAK3	Similar to Fibrillin-2 precursor
Os01g0687400	12.905	10.729	10.247	5.054	6.543	4.793	11.2937	5.46333	-1.04766	8.55e-06	0.000698677	PSC	Similar to Chitinase (EC 3.2.1.14)
Os08g0338600	9.022	10.073	7.602	3.716	4.324	4.85	8.899	4.29667	-1.05043	0.000256024	0.0105991	--	Conserved hypothetical protein
Os01g0601625	3.202	4.366	6.405	2.465	2.902	1.348	4.65767	2.23833	-1.05718	0.000928431	0.0278771	--	Leucine rich repeat, N-terminal domain containing protein
Os03g0748300	7.277	5.974	6.441	2.859	4.074	2.466	6.564	3.133	-1.06703	0.000121394	0.00596735	NDF5	Aldose 1-epimerase family protein
Os04g0117600	6.134	5.955	7.303	2.527	3.893	2.823	6.464	3.081	-1.06903	3.04e-06	0.000299645	--	Similar to H0613H07.1 protein
Os11g0514500	5.02	4.761	5.262	2.238	2.681	2.232	5.01433	2.38367	-1.07288	0.00151631	0.0399213	BAK1	Sorghum bicolor leucine-rich repeat-containing extracellular glycoprotein precursor
Os09g0268300	43.778	55.699	56.561	24.443	25.834	23.89	52.0127	24.7223	-1.07305	9.74e-15	3.75e-12	HEX6	Similar to Hexose carrier
Os10g0321700	3.326	3.856	3.924	1.378	2.06	1.84	3.702	1.75933	-1.07328	0.000750063	0.0235747	RBG3	Similar to Ribonucleoprotein like protein
Os11g0549695	8.537	8.603	8.159	3.76	3.857	4.404	8.433	4.007	-1.07352	3.66e-05	0.00227954	--	Maf-like protein family protein
Os05g0595100	94.186	108.373	114.217	48.797	57.151	43.954	105.592	49.9673	-1.07944	2.08e-16	9.85e-14	UGE-1	Uridine-diphospho-(UDP)-glucose 4-epimerase, Cell wall carbohydrate partitioning during nitrogen (N) limitatio
Os01g0176000	3.812	4.102	5.746	2.03	2.539	1.893	4.55333	2.154	-1.0799	0.00027272	0.0111464	UGT73C6	UDP-glucuronosyl/UDP-glucosyltransferase family protein
Os09g0242600	7.418	6.893	7.753	4.143	3.989	2.297	7.35467	3.47633	-1.08109	0.0010133	0.0299272	--	Hypothetical protein
Os12g0203000	2.361	4.084	3.931	1.681	1.885	1.312	3.45867	1.626	-1.08889	0.000454754	0.0165982	--	Similar to Cyclin-dependent protein kinase-like protein
Os03g0610800	7.792	9.197	7.198	2.931	3.411	5.027	8.06233	3.78967	-1.08913	7.77e-05	0.0041196	--	Similar to Protein zx
Os07g0635300	7.93	8.601	13.22	3.725	5.837	4.347	9.917	4.63633	-1.09692	1.41e-05	0.00105418	CYP709B2	Similar to Cytochrome P450
Os03g0348200	292.91	308.281	351.304	120.053	182.188	142.289	317.498	148.177	-1.09943	7.5e-16	3.28e-13	TPS7	Terpene synthase-like domain containing protein
Os01g0170051	4.636	4.814	5.486	2.217	1.824	2.913	4.97867	2.318	-1.10288	2.61e-05	0.00172351	--	Hypothetical protein
MSTRG.4168	5.757	6.169	3.941	2.853	2.368	2.166	5.289	2.46233	-1.10297	0.000857816	0.0260825	--	-
Os05g0158500	4.394	4.421	5.891	2.411	2.114	2.274	4.902	2.26633	-1.11301	5.77e-05	0.00328554	SCP26	Serine carboxypeptidase, Positive regulator of grain siz
Os01g0231700	11.283	12.502	9.425	4.105	5.624	5.604	11.07	5.111	-1.11498	0.000140095	0.00671503	RPP3A	Similar to 60S acidic ribosomal protein P2-B (CaRP2B)
Os08g0356500	2.1	2.901	2.895	0.914	1.408	1.319	2.632	1.21367	-1.11679	0.000717794	0.0228198	--	Protein of unknown function DUF247, plant family protein
Os01g0143800	11.422	14.719	13.848	6.441	8.67	3.326	13.3297	6.14567	-1.117	0.000298164	0.0120161	--	Mitochondrial glycoprotein family protein
Os10g0570200	16.949	20.69	28.002	12.279	11.778	6.106	21.8803	10.0543	-1.12182	0.000475931	0.0170173	--	Similar to RIR1b protein precursor
Os10g0198600	2.51	3.595	2.998	1.234	1.946	0.969	3.03433	1.383	-1.13358	0.000725061	0.0229555	--	Intron-encoded nuclease 2 domain containing protein
Os10g0475900	3.976	3.231	4.527	1.792	1.589	1.956	3.91133	1.779	-1.13659	0.000961184	0.0286518	UBI11	Ubiquitin domain containing protein
Os03g0856500	583.106	418.876	329.903	196.876	201.747	203.053	443.962	200.559	-1.14641	1.76e-11	4.93e-09	PSRP1	Similar to Plastid-specific 30S ribosomal protein 1, chloroplast precursor (CS- S5) (CS5) (S22) (Ribosomal protein 1) (PSRP-1)
MSTRG.14003	1.968	1.561	2.579	1.032	1.056	0.631	2.036	0.906333	-1.16762	0.000204035	0.00892034	--	PREDICTED: conserved [Prunus dulcis]
Os02g0625500	14.233	19.399	24.973	8.49	9.96	7.626	19.535	8.692	-1.1683	4.22e-07	5.05e-05	ADK2	Similar to Adenosine kinase-like protein (Fragment)
Os04g0637400	3.271	4.992	4.287	1.654	1.705	2.187	4.18333	1.84867	-1.17817	6.39e-05	0.00357387	--	Similar to PolI-like DNA polymerase
Os05g0215000	3.957	3.495	3.571	1.741	1.611	1.515	3.67433	1.62233	-1.17941	0.000616497	0.0206369	BURP1	BURP domain containing protein
Os02g0291500	5.989	6.097	4.943	2.749	2.465	2.283	5.67633	2.499	-1.18361	0.000263859	0.0108302	--	Conserved hypothetical protein
Os05g0555700	13.451	19.093	26.943	8.322	11.952	5.834	19.829	8.70267	-1.18808	9.84e-05	0.00504368	--	Conserved hypothetical protein
Os10g0113100	3.368	3.821	3.952	1.604	1.685	1.574	3.71367	1.621	-1.19596	0.000512944	0.0179624	--	Aldo/keto reductase family protein
Os08g0157500	72.384	95.577	118.162	39.55	52.863	32.187	95.3743	41.5333	-1.19933	4.21e-10	9.72e-08	COMT	Caffeic acid O-methyltransferase, Flavonoid 3'-O-methyltransferase, Melatonin biosynthesis, Tricin biosynthesis
Os09g0511700	17.533	16.674	19.216	8.049	7.544	7.572	17.8077	7.72167	-1.20551	1.39e-15	5.88e-13	BGLU32	Similar to Prunasin hydrolase isoform PH C precursor (EC 3.2.1.118)
Os01g0944100	5.085	8.348	7.104	2.973	3.393	2.44	6.84567	2.93533	-1.22167	0.000156554	0.0073334	--	Conserved hypothetical protein
Os01g0795200	12.161	6.239	7.707	3.605	4.373	3.175	8.70233	3.71767	-1.227	2.88e-06	0.000286547	SBT3.5	Similar to Subtilase
Os05g0336000	4.936	5.871	5.488	1.996	2.705	2.223	5.43167	2.308	-1.23475	3.79e-06	0.000354789	--	Hypothetical protein
Os10g0416500	34.617	32.489	33.735	19.868	12.771	10.14	33.6137	14.2597	-1.23711	9.34e-08	1.33e-05	--	Similar to Chitinase 1 precursor (EC 3.2.1.14) (Tulip bulb chitinase-1) (TBC-1)
Os02g0800500	63.792	60.321	64.731	27.671	28.649	23.479	62.948	26.5997	-1.24275	1.18e-30	1.31e-27	CYCB1-2	Similar to Cyclin B
Os10g0552400	4.368	7.456	10.319	2.541	4.411	2.402	7.381	3.118	-1.2432	0.000323576	0.0127969	PUB36	Zinc finger, RING/FYVE/PHD-type domain containing protein
Os01g0161300	2.443	2.799	4.13	1.713	1.446	0.797	3.124	1.31867	-1.24431	0.000263504	0.0108302	RLP6	Hypothetical conserved gene
Os04g0112100	8.55	10.704	11.064	3.612	4.555	4.592	10.106	4.253	-1.24866	2.9e-10	6.97e-08	--	NB-ARC domain containing protein
Os05g0427400	2.598	3.446	6.046	1.514	2.554	1.008	4.03	1.692	-1.25205	0.00133692	0.036462	ZB8	Similar to Phenylalanine ammonia-lyase
Os08g0205900	17.493	17.492	23.987	8.725	7.534	8.448	19.6573	8.23567	-1.25511	4.78e-12	1.42e-09	--	Similar to Viroid RNA-binding protein (Fragment)
Os04g0573900	3.503	3.985	6.547	1.838	2.162	1.876	4.67833	1.95867	-1.25612	6.62e-05	0.00367928	CYP704C1	Similar to cDNA clone:001-036-C03, full insert sequence
Os07g0106200	29.481	42.572	52.795	16.945	22.182	13.007	41.616	17.378	-1.25988	4.9e-09	9.49e-07	MST3	Similar to Hexose transporter
Os03g0411800	16.593	24.102	33.001	11.561	12.12	7.089	24.5653	10.2567	-1.26006	1.21e-06	0.000133282	ZIP2	Similar to Metal transport protein
Os08g0428300	1.335	1.069	1.429	0.41	0.62	0.566	1.27767	0.532	-1.26401	0.000512587	0.0179624	--	Similar to RNA polymerase Rpb3/Rpb11 dimerisation domain containing protein, expressed
Os02g0227700	4.244	3.736	7.766	1.468	3.254	1.79	5.24867	2.17067	-1.27381	7.74e-05	0.00411426	CLV1B	Serine/threonine protein kinase-related domain containing protein
Os09g0482400	182.289	173.607	148.027	65.599	77.794	63.49	167.974	68.961	-1.28439	7.26e-28	6.98e-25	HSP81-3	Similar to Heat shock protein 81-3
Os08g0191900	3.739	6.82	6.466	1.765	3.001	2.123	5.675	2.29633	-1.30529	1.61e-05	0.00117167	--	Pentatricopeptide repeat domain containing protein
Os12g0556500	2.865	5.56	6.732	2.272	2.613	1.246	5.05233	2.04367	-1.30579	0.000209472	0.00913037	SARD1	Calmodulin binding protein-like family protein
Os01g0147700	3.627	3.908	5.648	1.437	2.107	1.773	4.39433	1.77233	-1.30999	1.55e-06	0.000167333	FDM2	Region of unknown function XH domain containing protein
Os01g0940800	2.793	3.425	3.607	1.828	0.911	1.201	3.275	1.31333	-1.31826	0.00169716	0.043528	--	Similar to Beta-1,3-glucanase precursor
Os10g0560000	2.722	6.229	4.954	2.086	1.715	1.771	4.635	1.85733	-1.31934	0.000455582	0.0165982	VAB	Protein of unknown function DUF828, plant family protein
Os11g0565000	1.164	1.653	1.96	0.488	1.014	0.408	1.59233	0.636667	-1.32253	0.00157337	0.0411229	EIX1	Leucine-rich repeat, N-terminal domain containing protein
Os02g0536500	7.082	4.926	7.045	2.313	2.897	2.403	6.351	2.53767	-1.32348	0.000203796	0.00892034	--	Similar to H0622F05.5 protein
Os04g0448300	3.797	4.669	8.367	2.234	2.596	1.878	5.611	2.236	-1.32734	8.96e-05	0.00465928	nep1	Peptidase A1 domain containing protein
Os01g0364800	1.933	2.454	3.686	0.732	1.45	1.035	2.691	1.07233	-1.32739	0.000452205	0.0165379	WAK5	Protein kinase, catalytic domain domain containing protein
Os05g0549800	3.035	3.221	2.507	1.184	1.202	1.104	2.921	1.16333	-1.3282	0.00127866	0.0353408	--	Similar to DNA-binding protein RAV1
Os11g0539800	64.214	62.238	63.458	24.862	26.891	23.543	63.3033	25.0987	-1.33467	2.98e-34	4.53e-31	APP1	Similar to Xaa-Pro aminopeptidase 1
Os04g0531900	2.512	4.129	3.748	1.201	1.13	1.775	3.463	1.36867	-1.33925	0.000806081	0.0249031	SALR	Short-chain dehydrogenase/reductase SDR domain containing protein
Os04g0581000	5.216	4.761	7.928	3.265	2.372	1.416	5.96833	2.351	-1.34405	0.000195757	0.00868193	F3H-2	Similar to Flavanone 3-hydroxylase (Fragment)
Os06g0106800	5.457	3.596	4.05	1.798	1.357	2.006	4.36767	1.72033	-1.34417	2.27e-05	0.0015492	--	Similar to glycoside hydrolase, family 28
Os04g0129600	4.048	4.587	3.54	1.914	1.433	1.436	4.05833	1.59433	-1.34793	0.000342267	0.0133281	--	Similar to OSIGBa0131J24.6 protein
Os02g0187800	8.638	10.057	12.353	3.339	6.181	2.629	10.3493	4.04967	-1.35366	4.68e-06	0.000416808	CAD2	Cinnamyl-alcohol dehydrogenase, Lignin biosynthesis, Monolignol biosynthesi
Os01g0820000	2.781	3.576	5.817	1.684	1.806	1.271	4.058	1.587	-1.35447	0.000247355	0.0103742	CYP73A4	Similar to Cinnamate-4-hydroxylase
Os10g0512400	1.988	1.817	2.388	0.99	0.802	0.609	2.06433	0.800333	-1.367	0.000468533	0.0168783	CYP84A1	Coniferaldehyde 5-hydroxylase, Lignin biosynthesi
MSTRG.11843	16.073	15.484	19.731	5.216	7.978	6.559	17.096	6.58433	-1.37655	4.91e-06	0.000434631	PLT5	polyol transporter 5 [Oryza sativa Japonica Group]
Os05g0580000	3.529	8.057	7.323	2.504	2.28	2.46	6.303	2.41467	-1.38421	4.83e-06	0.000428529	AGPL3	Similar to ADP-glucose pyrophosphorylase (EC 2.7.7.27) (Fragment)
Os12g0123500	24.042	22.234	23.561	6.399	7.48	12.687	23.279	8.85533	-1.39441	2.51e-10	6.14e-08	APY3	Similar to Apyrase precursor (EC 3.6.1.5) (ATP-diphosphatase) (Adenosine diphosphatase) (ADPase) (ATP-diphosphohydrolase)
Os01g0660200	51.366	50.957	77.469	20.361	27.956	19.84	59.9307	22.719	-1.3994	2.54e-14	9.04e-12	CHIT3	Acidic class III chitinase OsChib3a precursor (Chitinase) (EC 3.2.1.14)
Os01g0973100	41.634	31.718	64.582	17.508	21.423	12.922	45.978	17.2843	-1.41148	0.000276535	0.0112545	--	Hypothetical conserved gene
Os01g0967800	52.653	44.641	52.704	18.517	19.356	18.191	49.9993	18.688	-1.4198	1.24e-34	2.1e-31	--	Conserved hypothetical protein
Os01g0178900	1.378	2.327	2.568	0.769	0.91	0.659	2.091	0.779333	-1.42388	0.00126572	0.0351094	--	Similar to Symbiosis-related disease resistance protein (Fragment)
Os09g0482640	1.937	4.832	4.75	1.745	1.348	1.189	3.83967	1.42733	-1.42766	4.37e-05	0.00264783	WAK2	Serine/threonine protein kinase-related domain containing protein
Os03g0197175	7.14	9.956	12.431	3.969	3.737	3.171	9.84233	3.62567	-1.44075	2.05e-07	2.66e-05	--	Hypothetical gene
Os09g0475800	5.756	4.211	4.601	1.376	1.823	2.139	4.856	1.77933	-1.44843	0.000158334	0.00738084	MNB1A	Transcriptional activator, Regulation of the C4 photosynthesis gene, OsC4PPD
Os03g0376600	2.838	5.832	3.783	1.942	1.645	0.946	4.151	1.511	-1.45796	0.000653151	0.0214014	CP29B	Similar to 29 kDa ribonucleoprotein, chloroplast precursor (RNA-binding protein cp29)
Os07g0283050	4.606	4.266	6.405	1.326	1.727	2.495	5.09233	1.84933	-1.46132	1.02e-06	0.000115388	SIT2	Concanavalin A-like lectin/glucanase, subgroup domain containing protein
Os06g0706400	2.551	4.351	5.38	1.511	1.61	1.31	4.094	1.477	-1.47084	3.23e-06	0.000312445	NPF8.5	PTR/NRT1 (peptide transporter/nitrate transporter 1) family protein, Nitrogen utilization efficiency, growth and grain yiel
Os02g0115700	374.03	482.639	557.847	151.91	198.953	158.505	471.505	169.789	-1.47353	6.22e-25	5.12e-22	CATA	Catalase isozyme A (EC 1.11.1.6) (CAT-A)
Os02g0177600	29.301	36.8	50.76	12.571	20.49	8.961	38.9537	14.0073	-1.47558	0.000709457	0.0226494	4CL3	4-coumarate:coenzyme A ligase, Lignin biosynthesis, Defense against woundin
Os01g0901600	2.646	1.519	1.562	0.888	0.64	0.521	1.909	0.683	-1.48286	0.000757155	0.0237142	4CLL6	Similar to 4-coumarate--CoA ligase-like 6
Os06g0316000	21.38	25.588	35.476	11.043	10.243	8.184	27.4813	9.82333	-1.48417	3.48e-07	4.24e-05	--	Conserved hypothetical protein
Os08g0102800	9.927	12.337	9.406	3.912	4.199	3.192	10.5567	3.76767	-1.48641	2.43e-06	0.000249467	--	Conserved hypothetical protein
Os09g0268000	8.605	10.511	10.719	2.861	4.418	3.363	9.945	3.54733	-1.48724	1.23e-12	3.95e-10	SIT2	Similar to lectin-like receptor kinase 7
Os08g0365500	2.813	4.161	3.173	1.394	1.528	0.696	3.38233	1.206	-1.48779	0.000978672	0.029113	WAK4	Similar to WAK80 - OsWAK receptor-like protein kinase
Os04g0594400	1.609	2.665	3.544	0.787	1.078	0.88	2.606	0.915	-1.50999	0.00104118	0.0305629	BPA1	Aldo/keto reductase domain containing protein
Os09g0339000	12.104	12.725	24.399	4.724	7.974	4.206	16.4093	5.63467	-1.54211	0.000717738	0.0228198	CHARK	Protein kinase, core domain containing protein
Os05g0486600	3.831	3.57	3.632	1.11	1.322	1.327	3.67767	1.253	-1.5534	3.17e-08	5.13e-06	BRCA1	Hypothetical conserved gene
Os11g0565920	1.332	2.151	2.719	0.651	0.714	0.744	2.06733	0.703	-1.55617	1.14e-05	0.000890942	EIX2	Leucine-rich repeat domain containing protein
Os09g0438000	7.864	9.916	14.873	3.883	4.464	2.743	10.8843	3.69667	-1.55796	4.69e-11	1.25e-08	RBOHE	Similar to RbohAOsp (Fragment)
Os05g0136900	18.356	19.795	25.916	6.959	8.753	6.022	21.3557	7.24467	-1.55963	1.57e-16	7.69e-14	AT4	Transferase family protein
Os05g0217700	7.497	7.028	3.602	1.092	1.978	3.055	6.04233	2.04167	-1.56536	0.000157408	0.00734954	BURP7	BURP domain containing protein
Os03g0196400	8.853	11.463	12.18	2.802	5.306	2.692	10.832	3.6	-1.58923	1.99e-08	3.36e-06	--	Similar to UPF0497 membrane protein 12
Os08g0453700	7.773	9.496	15.033	3.133	5.121	2.471	10.7673	3.575	-1.59065	0.000362024	0.0139348	RBOHE	Similar to ATRBOH F (ARABIDOPSIS THALIANA RESPIRATORY BURST OXIDASE PROTEIN F); NAD(P)H oxidase
Os06g0591400	32.264	18.854	32.725	11.55	11.051	4.793	27.9477	9.13133	-1.61383	1.17e-07	1.65e-05	--	Conserved hypothetical protein
Os03g0571700	1.576	2.561	3.205	0.645	0.447	1.304	2.44733	0.798667	-1.61555	0.00160695	0.0417359	DTX40	Similar to TRANSPARENT TESTA 12 protein
Os06g0475400	1.698	1.772	2.025	0.722	0.792	0.279	1.83167	0.597667	-1.61574	0.000325247	0.0128084	XAX1	Glycosyltransferase AER61, uncharacterized domain containing protein
Os12g0512400	1.179	2.715	3.864	0.409	1.575	0.524	2.586	0.836	-1.62915	8.53e-05	0.00445294	RPPL1	Similar to NB-ARC domain containing protein, expressed
Os10g0517500	3.757	3.841	3.137	1.67	0.865	0.934	3.57833	1.15633	-1.62973	8.42e-06	0.000691959	MGL	Cys/Met metabolism, pyridoxal phosphate-dependent enzyme domain containing protein
Os02g0100100	14.927	13.879	16.476	4.348	5.57	4.714	15.094	4.87733	-1.62981	1.15e-22	8.13e-20	PDIL1-4	Thioredoxin domain domain containing protein
Os07g0654500	2.779	3.155	4.899	1.278	1.857	0.36	3.611	1.165	-1.63207	0.000400656	0.0150311	--	Hypothetical protein
Os05g0278500	22.398	33.925	46.947	9.496	16.143	7.613	34.4233	11.084	-1.63491	0.000401108	0.0150311	AT5	Transferase family protein
Os03g0291500	28.098	33.072	28.015	12.446	6.227	9.838	29.7283	9.50367	-1.64528	1.94e-14	7.17e-12	--	Asparagine synthetase, Biosynthesis of asparagine following the supply of ammoniu
Os11g0237700	28.405	29.67	24.864	9.291	9.791	7.387	27.6463	8.823	-1.64775	1.67e-21	1.05e-18	mrnC	Similar to URF 4-related
Os04g0371000	17.12	19.746	23.452	5.926	8.953	4.348	20.106	6.409	-1.64945	2.25e-09	4.63e-07	WAKL4	Four-helical cytokine family protein
Os01g0841700	4.053	3.902	7.051	1.903	1.391	1.446	5.002	1.58	-1.66258	0.000213339	0.00923709	ERG1	Similar to Isoform ERG1b of Elicitor-responsive protein 1
Os04g0369100	1.396	2.462	3.379	0.627	1.113	0.529	2.41233	0.756333	-1.67334	0.000289404	0.0117121	JAL3	Similar to H0607F01.9 protein
Os02g0528900	0.53	0.537	0.493	0.177	0.164	0.139	0.52	0.16	-1.70044	0.00195251	0.0484018	ABCG41	Similar to PDR-like ABC transporter
Os03g0226400	158.725	187.524	163.539	47.025	47.929	61.379	169.929	52.111	-1.70528	3.29e-40	7.3e-37	MTP4	Manganese transporter, Cation diffusion facilitator (CDF) family member, Mn toleranc
Os01g0973150	4.313	4.019	6.446	1.15	1.653	1.67	4.926	1.491	-1.72414	4.3e-06	0.000393703	--	Hypothetical protein
gene-cox1	1.917	5.445	1.261	1.18	0.611	0.764	2.87433	0.851667	-1.75487	0.00128905	0.0354919	-	-
Os03g0109900	24.239	31.105	29.482	5.787	4.44	14.395	28.2753	8.20733	-1.78456	0.00141294	0.0379967	--	Peptidase, trypsin-like serine and cysteine domain containing protein
Os04g0119800	10.275	8.591	6.107	2.048	2.534	2.647	8.32433	2.40967	-1.7885	1.83e-14	6.85e-12	--	Leucine-rich repeat domain containing protein
Os07g0677200	188.047	301.323	493.425	120.434	107.996	54.658	327.598	94.3627	-1.79564	0.00108274	0.0313051	PRX112	Peroxidase
Os04g0324000	3.366	5.458	5.095	1.761	1.511	0.727	4.63967	1.333	-1.79934	2.61e-06	0.000262859	--	Hypothetical protein
MSTRG.1213	0.67	1.217	1.46	0.3	0.151	0.493	1.11567	0.314667	-1.82601	0.00121162	0.0340752	--	NBS-LRR-like protein [Oryza sativa Japonica Group]
Os12g0639600	2.486	3.871	5.788	1.29	1.521	0.592	4.04833	1.13433	-1.83548	1.19e-06	0.000131896	HIPL1	Similar to Hedgehog-interacting-like protein
Os01g0564300	25.934	55.361	73.758	13.78	16.816	12.363	51.6843	14.3197	-1.85173	8.05e-05	0.00424024	FKBP65	Peptidyl-prolyl cis-trans isomerase, FKBP-type domain containing protein
Os05g0211100	1.59	0.793	1.965	0.479	0.206	0.497	1.44933	0.394	-1.87912	0.00142431	0.038231	CYP51	Similar to Cytochrome P450-like protein
Os03g0838400	11.746	18.868	25.948	5.12	7.192	3.045	18.854	5.119	-1.88094	0.000144799	0.00689467	AMT3-2	Ammonium transporter
Os03g0153900	0.982	1.837	1.43	0.52	0.463	0.152	1.41633	0.378333	-1.90443	0.0013422	0.0365714	MO2	Aromatic-ring hydroxylase family protein
MSTRG.25112	89.183	140.22	177.573	35.637	48.791	24.199	135.659	36.209	-1.90556	2.51e-06	0.000256418	--	Os09g0304800 [Oryza sativa Japonica Group]
Os04g0458300	2.203	3.543	3.536	0.894	0.749	0.787	3.094	0.81	-1.93348	6.16e-06	0.000522355	Galm	Similar to OSIGBa0097P08.2 protein
Os06g0294000	3.177	1.44	2.838	0.497	0.599	0.849	2.485	0.648333	-1.93844	1.39e-07	1.94e-05	--	Conserved hypothetical protein
Os01g0691050	2.692	2.125	1.938	0.705	0.644	0.329	2.25167	0.559333	-2.00921	0.000624473	0.0207834	PR5K	Protein kinase, catalytic domain domain containing protein
Os01g0850550	1.634	1.633	2.479	0.405	0.856	0.162	1.91533	0.474333	-2.01362	0.000141465	0.00676946	LAC6	Similar to Laccase-6
Os04g0184100	3.959	2.995	3.389	0.836	1.043	0.564	3.44767	0.814333	-2.08193	3.22e-09	6.45e-07	--	Similar to OSIGBa0140C02.7 protein
Os04g0674700	1.566	1.785	2.126	0.599	0.603	0.087	1.82567	0.429667	-2.08713	0.000145469	0.00691516	AAE5	Similar to AMP-binding protein (Adenosine monophosphate binding protein 5 AMPBP5)
Os01g0731100	3.029	3.612	5.061	0.208	1.155	1.367	3.90067	0.91	-2.09978	2.73e-05	0.00178788	--	Similar to Pathogen-related protein
Os06g0579200	2.753	1.938	2.403	0.538	0.738	0.376	2.36467	0.550667	-2.10239	2.45e-06	0.000251033	--	Low-affinity cation transporter, Regulation of cadmium transport to the grain
Os10g0569400	36.623	63.459	67.232	11.875	14.094	12.216	55.7713	12.7283	-2.13148	9.41e-22	6.31e-19	--	RIR1a protein precursor
Os09g0431100	1.297	1.393	2.604	0.26	0.658	0.287	1.76467	0.401667	-2.13533	9.77e-07	0.00011185	GLR2.8	GPCR, family 3, metabotropic glutamate receptor-like protein
Os02g0772100	1.111	2.784	6.548	0.441	0.605	1.303	3.481	0.783	-2.15242	0.000226717	0.00964561	--	Conserved hypothetical protein
Os04g0288500	1.34	2.184	2.668	0.408	0.636	0.321	2.064	0.455	-2.1815	2.61e-07	3.26e-05	LECRK91	Protein kinase, catalytic domain domain containing protein
MSTRG.206	2.189	10.888	9.44	2.393	1.301	1.239	7.50567	1.64433	-2.19048	2.66e-05	0.00175065	--	OSJNBb0004A17.3 [Oryza sativa Japonica Group]
Os01g0137800	0.53	0.544	1.782	0.324	0.184	0.117	0.952	0.208333	-2.19207	7.05e-05	0.0038612	-	-
Os04g0117900	12.102	23.703	26.918	3.919	5.624	4.164	20.9077	4.569	-2.19408	5.73e-18	3.01e-15	AMI1	Amidase family protein
MSTRG.3830	1.789	3.954	4.131	0.631	1.038	0.482	3.29133	0.717	-2.19863	2.49e-07	3.15e-05	--	Os10g0134033 [Oryza sativa Japonica Group]
MSTRG.1852	23.387	14.356	16.41	4.024	3.994	3.695	18.051	3.90433	-2.20893	2.75e-42	7.2e-39	pif1	Os01g0630700 [Oryza sativa Japonica Group]
Os01g0962700	5.226	9.067	10.814	1.591	2.027	1.655	8.369	1.75767	-2.25139	4.05e-13	1.31e-10	--	Similar to Peroxidase 12 precursor (EC 1.11.1.7) (Atperox P12) (PRXR6) (ATP4a)
Os07g0117300	3.125	2.625	3.381	0.556	0.61	0.732	3.04367	0.632667	-2.26629	4.56e-09	8.89e-07	--	NB-ARC domain containing protein
Os11g0533100	0.656	0.562	0.635	0.016	0.211	0.15	0.617667	0.125667	-2.29723	0.000486447	0.0173504	--	Similar to CarD-like transcriptional regulator family protein, expressed
MSTRG.23928	5.157	12.751	14.474	2.296	3.268	1.011	10.794	2.19167	-2.30013	0.000472606	0.0169404	--	Os10g0358150, partial [Oryza sativa Japonica Group]
Os06g0493100	7.899	15.227	16.533	1.563	4.712	1.73	13.2197	2.66833	-2.30867	7.71e-08	1.14e-05	--	Conserved hypothetical protein
Os04g0337500	0.6	1.34	1.118	0.214	0.154	0.231	1.01933	0.199667	-2.35196	0.00141242	0.0379967	--	Aldo/keto reductase family protein
MSTRG.534	1.034	2.685	3.176	0.452	0.682	0.216	2.29833	0.45	-2.35259	6.96e-05	0.00383335	--	Os07g0187000, partial [Oryza sativa Japonica Group]
MSTRG.5050	1.442	1.547	1.325	0.329	0.36	0.153	1.438	0.280667	-2.35713	0.0010491	0.0306706	--	putative enoyl-CoA-hydratase [Oryza sativa Japonica Group]
Os03g0341600	3.411	6.011	7.003	0.42	1.075	1.697	5.475	1.064	-2.36336	3.17e-06	0.000309432	--	Pollen Ole e 1 allergen/extensin domain containing protein
MSTRG.23837	1.96	1.649	2.072	0.501	0.321	0.269	1.89367	0.363667	-2.38049	3.95e-08	6.26e-06	--	protein ANTAGONIST OF LIKE HETEROCHROMATIN PROTEIN 1 [Oryza sativa Japonica Group]
Os07g0542400	1.475	7.245	6.157	1.23	0.603	0.976	4.959	0.936333	-2.40496	0.00151633	0.0399213	CRK6	Similar to Receptor protein kinase
Os01g0115500	0.912	1.392	1.995	0.42	0.088	0.293	1.433	0.267	-2.42413	0.00136956	0.0370429	LRK10	Similar to Receptor-like kinase
Os10g0537800	1.85	3.994	4.443	0.847	0.674	0.275	3.429	0.598667	-2.51796	2.66e-07	3.31e-05	AED3	Peptidase aspartic, catalytic domain containing protein
Os09g0541000	3.714	4.724	4.463	0.235	1.495	0.515	4.30033	0.748333	-2.5227	1.09e-07	1.55e-05	PIP2-7	Similar to Aquaporin 2
Os04g0113800	5.918	7.079	6.145	1.35	0.845	1.079	6.38067	1.09133	-2.54762	7.4e-08	1.11e-05	--	Hypothetical conserved gene
Os02g0517900	1.154	1.667	2.028	0.33	0.298	0.199	1.61633	0.275667	-2.55173	1.12e-08	1.99e-06	--	Aminotransferase-like, plant mobile domain domain containing protein
Os01g0186600	3.015	13.485	21.198	1.99	2.726	1.494	12.566	2.07	-2.60182	0.00135629	0.0367609	--	Conserved hypothetical protein
MSTRG.5923	21.723	19.908	20.056	3.769	3.234	3.136	20.5623	3.37967	-2.60505	8.1e-88	5.84e-84	BSK1-2	Os07g0499300 [Oryza sativa Japonica Group]
Os03g0701300	13.375	12.733	11.898	1.563	2.936	1.665	12.6687	2.05467	-2.62429	2.41e-12	7.33e-10	--	Similar to predicted protein
Os08g0256700	1.009	1.754	2.987	0.431	0.378	0.121	1.91667	0.31	-2.62826	6.48e-05	0.00360815	--	Conserved hypothetical protein
Os06g0591200	16.121	21.619	21.645	2.47	4.196	2.82	19.795	3.162	-2.64623	1.72e-25	1.51e-22	--	Conserved hypothetical protein
Os09g0275400	49.812	50.287	79.808	4.725	10.986	12.947	59.969	9.55267	-2.65024	1.97e-08	3.34e-06	CYP71D55	Cytochrome P450 family protein
Os03g0647600	10.718	12.397	13.235	1.626	1.281	2.866	12.1167	1.92433	-2.65456	1.07e-25	9.69e-23	NFYA10	Similar to Nf-Y-A subunit
MSTRG.20088	16.573	12.957	5.18	0.532	2.352	2.129	11.57	1.671	-2.79161	0.000120354	0.00593644	--	Os06g0480250 [Oryza sativa Japonica Group]
Os07g0129300	10.235	16.531	13.614	0.85	3.861	1.076	13.46	1.929	-2.80275	4.55e-05	0.00273383	PRMS	Similar to PR1a protein
Os01g0553901	0.403	0.184	0.207	0.075	0.014	0.023	0.264667	0.0373333	-2.82564	0.00199702	0.0492934	--	HGWP repeat domain containing protein
Os02g0253700	4.057	2.665	2.644	0.093	0.811	0.345	3.122	0.416333	-2.90666	2.23e-07	2.87e-05	--	Conserved hypothetical protein
Os11g0236932	2.114	1.56	4.01	0.69	0.216	0.092	2.56133	0.332667	-2.94475	0.000666809	0.0217165	--	Hypothetical conserved gene
Os01g0615050	8.483	4.098	7.177	0.403	0.972	1.127	6.586	0.834	-2.98128	2.23e-09	4.63e-07	--	Proteinase inhibitor I13, potato inhibitor I family protein
Os11g0598500	1.586	11.952	13.051	1.628	0.717	0.995	8.863	1.11333	-2.99291	0.00116023	0.032919	PIK-2	NB-ARC domain containing protein
Os04g0666800	2.28	1.435	2.425	0.267	0.22	0.249	2.04667	0.245333	-3.06046	3.46e-05	0.00216839	DIR20	Similar to H1005F08.21 protein
Os01g0273800	1.164	0.76	1.603	0.261	0.099	0.035	1.17567	0.131667	-3.15852	6.13e-05	0.00343898	YUC10	FAD-dependent pyridine nucleotide-disulphide oxidoreductase domain containing protein
Os02g0768300	0.432	0.543	1.057	0	0.122	0.103	0.677333	0.075	-3.1749	0.0017729	0.0450325	--	Protein of unknown function DUF6, transmembrane domain containing protein
Os11g0576400	0.618	0.517	0.581	0	0.116	0.066	0.572	0.0606667	-3.23704	0.00194891	0.0483541	--	Similar to HAT family dimerisation domain containing protein, expressed
Os09g0417500	0.625	0.589	0.309	0.08	0.044	0.037	0.507667	0.0536667	-3.24178	0.000133352	0.0064262	--	Pentatricopeptide repeat domain containing protein
MSTRG.12790	2.057	3.179	2.492	0.235	0.428	0.146	2.576	0.269667	-3.25588	1.73e-09	3.7e-07	--	NADPH--cytochrome P450 reductase [Oryza sativa Japonica Group]
Os10g0538200	0.482	0.83	1.588	0	0.295	0	0.966667	0.0983333	-3.29727	0.000809124	0.0249703	AED3	Peptidase aspartic, catalytic domain containing protein
Os07g0677100	0.642	2.607	4.302	0.33	0.09	0.346	2.517	0.255333	-3.30125	3.17e-06	0.000309432	PRX112	Peroxidase
Os04g0688500	0.473	0.844	2.216	0	0.246	0.104	1.17767	0.116667	-3.33547	0.000188328	0.00845131	--	Peroxidase (EC 1.11.1.7)
Os06g0268500	0.147	0.247	0.499	0.034	0.018	0.031	0.297667	0.0276667	-3.42748	0.00123994	0.0345019	RGA2	Similar to OSIGBa0139J17.1 protein
Os08g0285600	0.366	0.166	0.359	0.049	0	0.03	0.297	0.0263333	-3.4955	0.00102624	0.0302473	--	Similar to phytosulfokine receptor
Os12g0576100	17.455	19.56	21.632	2.023	1.503	1.238	19.549	1.588	-3.62181	4.47e-30	4.78e-27	--	Conserved hypothetical protein
Os12g0188500	0.831	0.722	0.569	0.03	0	0.142	0.707333	0.0573333	-3.62494	0.000195472	0.00868193	PRL1-IFG	Hypothetical conserved gene
Os03g0342100	0.276	1.216	1.557	0.057	0.186	0	1.01633	0.081	-3.64931	0.00150995	0.039899	--	Pollen Ole e 1 allergen/extensin domain containing protein
Os07g0554600	0.846	1.044	0.98	0.102	0.114	0	0.956667	0.072	-3.73195	8.12e-06	0.000671348	--	F-box domain, Skp2-like domain containing protein
Os08g0298800	1.858	2.571	2.945	0.183	0.268	0.085	2.458	0.178667	-3.78214	1.41e-12	4.46e-10	--	Similar to cDNA clone:001-036-H04, full insert sequence
Os11g0237900	0.559	0.46	0.753	0	0.122	0	0.590667	0.0406667	-3.86043	1.85e-05	0.00130821	RGA5	Similar to NB-ARC domain containing protein
Os08g0192300	1.974	5.036	2.45	0.203	0.222	0.189	3.15333	0.204667	-3.94553	0.0010558	0.0308039	--	Conserved hypothetical protein
Os01g0824700	30.564	25.172	28.033	1.954	1.558	1.822	27.923	1.778	-3.97313	3.64e-118	5.26e-114	--	Cyclin-like F-box domain containing protein
Os08g0231400	9.462	24.698	38.527	0.935	1.708	1.307	24.229	1.31667	-4.20177	3.19e-11	8.76e-09	--	Germin-like protein 8-12, Disease resistanc
Os08g0203400	0.419	1.336	2.532	0.169	0.017	0.043	1.429	0.0763333	-4.22655	0.000177691	0.00811276	--	Protein kinase, core domain containing protein
Os07g0162450	1.426	0.472	0.414	0.084	0	0.039	0.770667	0.041	-4.23241	0.000526354	0.0182987	--	Protein of unknown function DUF3778 domain containing protein
Os01g0674700	25.123	24.927	28.852	0.761	1.801	0.774	26.3007	1.112	-4.56387	1.55e-32	1.87e-29	EMB2279	Similar to EMB2279 (EMBRYO DEFECTIVE 2279)
Os01g0137950	0.748	1.671	1.122	0.113	0	0	1.18033	0.0376667	-4.96976	0.000138728	0.00667168	LRK10L-2.6	Similar to predicted protein
Os08g0113000	0.216	3.969	2.195	0.074	0.122	0	2.12667	0.0653333	-5.02463	0.000650624	0.0214014	PER47	Similar to Peroxidase 47 precursor (EC 1.11.1.7) (Atperox P47) (ATP32)
Os02g0727100	7.914	10.383	9.925	0.428	0.176	0.249	9.40733	0.284333	-5.04813	1.17e-49	3.74e-46	AVT6A	Amino acid transporter, transmembrane domain containing protein
Os04g0116600	5.616	3.513	5.268	0	0.156	0.239	4.799	0.131667	-5.18777	2.69e-24	2.04e-21	KCR1	Glucose/ribitol dehydrogenase family protein
Os12g0171900	16.172	16.155	11.358	0.313	0.114	0.681	14.5617	0.369333	-5.30111	1.55e-21	9.96e-19	--	Hypothetical gene
MSTRG.14986	1.917	1.445	2.698	0.035	0.089	0.022	2.02	0.0486667	-5.37528	1.36e-24	1.09e-21	GIP	copia-type pol polyprotein [Zea mays]
Os07g0153150	3.047	0.955	0.802	0.082	0.03	0	1.60133	0.0373333	-5.42267	2.38e-09	4.86e-07	--	Conserved hypothetical protein
Os08g0170700	1.495	1.261	2.013	0	0.019	0.049	1.58967	0.0226667	-6.13201	2.57e-13	8.61e-11	RGA5	Disease resistance protein domain containing protein
Os08g0507100	0.214	1.982	2.273	0	0.034	0.029	1.48967	0.021	-6.14846	1.14e-06	0.00012719	CYP76M5	Cytochrome P450 family protein
Os04g0122000	3.943	4.449	3.621	0.02	0.066	0.056	4.00433	0.0473333	-6.40256	2.23e-27	2.07e-24	--	Leucine-rich repeat, N-terminal domain containing protein
Os03g0229000	1.239	1.519	1.338	0.018	0	0.017	1.36533	0.0116667	-6.87072	1e-09	2.21e-07	--	Conserved hypothetical protein
Os08g0410900	4.733	4.092	3.772	0.064	0.035	0	4.199	0.033	-6.99144	6.67e-15	2.6e-12	--	Hypothetical gene
Os05g0571300	1.507	1.488	0.955	0.026	0	0	1.31667	0.00866667	-7.2472	8.48e-08	1.22e-05	--	Conserved hypothetical protein
Os09g0419100	0.201	0.102	0.234	0	0	0	0.179	0.001	-7.48382	1.68e-05	0.00120269	--	Hypothetical protein
Os08g0261000	0.172	0.236	0.159	0	0	0	0.189	0.001	-7.56224	0.000141968	0.00678225	RPM1	NB-ARC domain containing protein
Os04g0255525	0.28	0.133	0.254	0	0	0	0.222333	0.001	-7.79658	0.000325369	0.0128084	--	Hypothetical gene
Os12g0171801	0.225	0.326	0.507	0	0	0	0.352667	0.001	-8.46216	0.000125409	0.00613333	--	Hypothetical gene
Os04g0129350	0.399	0.433	0.334	0	0	0	0.388667	0.001	-8.60239	4.25e-05	0.00258572	--	Hypothetical gene
Os10g0109600	0.129	0.748	0.34	0	0	0	0.405667	0.001	-8.66415	0.0011054	0.031801	HRPN	Peroxidase (EC 1.11.1.7)
Os01g0816700	0.226	0.684	0.348	0	0	0	0.419333	0.001	-8.71195	3.78e-06	0.000354789	Bp10	Similar to L-ascorbate oxidase homolog precursor (EC 1.10.3.3) (Ascorbase)
Os06g0722201	0.514	0.392	0.564	0	0	0	0.49	0.001	-8.93664	3.72e-10	8.72e-08	--	Hypothetical gene
Os06g0722600	0.514	0.392	0.564	0	0	0	0.49	0.001	-8.93664	3.72e-10	8.72e-08	--	Hypothetical gene
Os04g0125100	0.41	0.357	0.925	0	0	0	0.564	0.001	-9.13955	0.000337102	0.0131803	--	Hypothetical protein
Os04g0128700	0.163	0.529	1.103	0	0	0	0.598333	0.001	-9.22481	1.67e-05	0.00120256	--	Thioredoxin-like fold domain containing protein
Os05g0592450	0.693	0.524	0.591	0	0	0	0.602667	0.001	-9.23522	1.55e-05	0.00113633	--	Hypothetical gene
Os11g0300650	0.506	0.724	0.638	0	0	0	0.622667	0.001	-9.28232	1.98e-06	0.00020928	--	Similar to predicted protein
Os09g0319800	0.27	0.573	1.065	0	0	0	0.636	0.001	-9.31288	7.28e-05	0.0039395	CPS4	Terpene synthase-like domain containing protein
Os07g0496401	1.367	0.456	0.183	0	0	0	0.668667	0.001	-9.38514	1.58e-07	2.15e-05	--	Hypothetical protein
Os01g0817633	0.363	0.811	0.842	0	0	0	0.672	0.001	-9.39232	4.61e-05	0.00275246	--	Hypothetical gene
Os04g0126900	1.076	0.267	0.78	0	0	0	0.707667	0.001	-9.46693	0.00109185	0.0314739	--	Similar to H0124E07.4 protein
Os10g0548750	0.193	1.347	0.592	0	0	0	0.710667	0.001	-9.47303	3.19e-05	0.00204791	--	Hypothetical protein
MSTRG.14725	0.468	0.361	1.348	0	0	0	0.725667	0.001	-9.50316	8.61e-05	0.00448685	--	OSJNBa0070D17.13 [Oryza sativa Japonica Group]
Os08g0340700	0.653	0.98	0.629	0	0	0	0.754	0.001	-9.55842	7.14e-09	1.31e-06	-	-
Os01g0674150	0.768	0.653	0.867	0	0	0	0.762667	0.001	-9.57491	3.02e-05	0.00194235	--	Conserved hypothetical protein
Os04g0126500	0.458	1.307	0.687	0	0	0	0.817333	0.001	-9.67478	1.03e-05	0.000804971	--	Hypothetical protein
Os11g0250100	1.123	0.829	1.267	0	0	0	1.073	0.001	-10.0674	5.31e-08	8.24e-06	--	Conserved hypothetical protein
Os01g0702900	1.316	0.968	0.978	0	0	0	1.08733	0.001	-10.0866	2.61e-08	4.3e-06	PAPS2	Similar to Sucrose-phosphate synthase (EC 2.4.1.14)
Os08g0226600	0.903	1.061	1.495	0	0	0	1.153	0.001	-10.1712	2.75e-09	5.56e-07	--	Hypothetical gene
Os11g0100200	1.722	0.905	1.206	0	0	0	1.27767	0.001	-10.3193	4.13e-07	4.97e-05	ALY1	Similar to ALY protein
MSTRG.14709	0.869	1.553	1.776	0	0	0	1.39933	0.001	-10.4505	1.53e-10	3.88e-08	--	B1292H11.25 [Oryza sativa Japonica Group]
MSTRG.23722	1.963	1.707	0.712	0	0	0	1.46067	0.001	-10.5124	2.98e-06	0.000294264	--	Os07g0278866 [Oryza sativa Japonica Group]
Os04g0121800	1.087	2.1	2.724	0	0	0	1.97033	0.001	-10.9442	1.94e-05	0.00136342	--	Hypothetical conserved gene
Os01g0630900	2.178	1.926	2.041	0	0	0	2.04833	0.001	-11.0002	1.91e-10	4.76e-08	--	Hypothetical conserved gene
Os11g0539901	3.171	2.167	0.822	0	0	0	2.05333	0.001	-11.0038	4.21e-06	0.000388426	--	Hypothetical conserved gene
Os11g0100100	2.19	2.735	2.463	0	0	0	2.46267	0.001	-11.266	3.59e-14	1.26e-11	ATG8D	Similar to Autophagy-related protein 8D
Os04g0127500	3.063	2.418	2.667	0	0	0	2.716	0.001	-11.4073	6.35e-14	2.21e-11	WAK5	Serine/threonine protein kinase-related domain containing protein
Os11g0237600	3.009	2.741	3.447	0	0	0	3.06567	0.001	-11.582	2.19e-16	1.02e-13	RGA5	Hypothetical conserved gene
MSTRG.13693	2.975	2.533	4.143	0	0	0	3.217	0.001	-11.6515	2.57e-11	7.12e-09	--	Os09g0434550 [Oryza sativa Japonica Group]
Os04g0127200	4.103	4.575	5.275	0	0	0	4.651	0.001	-12.1833	3.31e-17	1.68e-14	SBT3.8	Hypothetical conserved gene
Os08g0184800	8.753	7.861	7.785	0	0	0	8.133	0.001	-12.9896	5.36e-19	2.92e-16	--	Conserved hypothetical protein
Os11g0540600	65.518	94.951	108.31	0	0	0	89.593	0.001	-16.4511	1.51e-29	1.56e-26	--	Protein of unknown function DUF247, plant family protein
Note: Genes that are involved in the generation and scavenge of ROS are highlighted in yellow background.

## Sheet: Table S3
Supplementary Table 3. Sequence variation and allele frequency of GCSC1.
Haplotype	Represnetative accession	vg0315481822		vg0315481885		vg0315481911		Accession number (Frequency)a
		Nucleotide (position in gene)	Amino acid (position in protein)	Nucleotide (position in gene)	Amino acid (position in protein)	Nucleotide (position in gene)	Amino acid (position in protein)	Japonica	Indica	Intermediate	Aus	Aromatic	Total accession number
Hap I	TQ	G (215)	S (72)	C (152)	R (51)	GAG (126-129)	-	250 (9.35%)	2335 (87.32%)	52 (1.95%)	30 (1.12%)	7 (0.26%)	2674 (56.58 %)
Hap II	LM	G (215)	S (72)	T (152)	H (51)	GAG (126-129)	-	380 (54.52%)	220 (31.56%)	16 (2.30%)	1 (0.14%)	80 (11.48%)	697 (14.75%)
Hap III	Nipponbare	T (215)	Y (72)	T (152)	H (51)	GAG (126-129)	-	703 (91.42%)	6 (0.78%)	10 (1.30%)	50 (6.50%)	0 (0.00%)	769 (16.27%)
Hap IV	Kasalath	G (215)	S (72)	C (152)	R (51)	GAGGAG (126-132)	S (42) Insertion	169 (36.50%)	127 (27.43%)	6 (1.30%)	156 (33.69%)	5 (1.08%)	463 (9.80%)
aAllele frequency was calculted based on genotypes of 4726 rice accessions from RiceVarMap v2.0 (http://ricevarmap.ncpgr.cn/).

## Sheet: Table S4
Supplementary Table 4. The primers used in this study
Primer name	Primer sequence (5'-3')	Description
Primers for fine mapping
L14212 F	GGGTCAAGTCAAGGCAAGAA	SSR marker for fine mapping
L14212 R	CTGTCGCAGTCGCTACAGAA	SSR marker for fine mapping
L14892 F	AGAGGTAAGGTAAGGCACAACT	SSR marker for fine mapping
L14892 R	TCGTCGATCTCACCGTCATT	SSR marker for fine mapping
L15406 F	GCGAAAAACGATGGAGAGAG	SSR marker for fine mapping
L15406 R	ACTCAGGGCAAAACGATCC	SSR marker for fine mapping
L15483 F	CCCCTACCGTTCTTGCTG	SSR marker for fine mapping
L15483 R	AAAGGACAAAAATACCCTTCCAC	SSR marker for fine mapping
L15525 F	GAGACCAATATGGCACTACTATGT	SSR marker for fine mapping
L15525 R	TCAGTATGAAAAGCAGAGGACA	SSR marker for fine mapping
L15562 F	CAGTGGCGTCAAGATGGAG	SSR marker for fine mapping
L15562 R	ATGCGTTTGGAGCCATTGTT	SSR marker for fine mapping
L15980 F	TCATATTCGACTGCCTGGTG	SSR marker for fine mapping
L15980 R	TCGCACGTTACTACCGTCTC	SSR marker for fine mapping
L22000 F	ATCTTTTCCGTGCTGGTGAT	SSR marker for fine mapping
L22000 R	TTTTGCTTAGCCGTATCAGG	SSR marker for fine mapping
Primers for constructs
U3 gRNA F1	ggcAGATGGACGCGAAGACTCGG	Target sequences of GCSC1 for CRISPR-Cas9 construct
U3 gRNA R1	AAAC CCGAGTCTTCGCGTCCATC	Target sequences of GCSC1 for CRISPR-Cas9 construct
U6a gRNA F2	gccGGTCTCGCCGAGAACCACGG	Target sequences of GCSC1 for CRISPR-Cas9 construct
U6a gRNA R2	AAAC CCGTGGTTCTCGGCGAGAC	Target sequences of GCSC1 for CRISPR-Cas9 construct
p1301-GCSC1pro F1	GAGCTCGGTACCCGG GGATCC CCTCTGTGTTGCGCCATCG	Amplify GCSC1 promoter for GCSC1pro::GCSC1-eGFP-3’UTR construct
p1301-GCSC1pro R1	CGTTCGCTCGCGCGCTTCCTCCCTCCTCCGCTCTG	Amplify GCSC1 promoter for GCSC1pro::GCSC1-eGFP-3’UTR construct
p1301-GCSC1g F2	GCGCGCGAGCGAACGATGGAGGCGGCGGCGG	Amplify GCSC1 genomic sequence for GCSC1pro::GCSC1-eGFP-3’UTR construct
p1301-GCSC1g R2	tgaaccgcctccaccCTGTTGAGATCCAGAATCAGGTTCTTC	Amplify GCSC1 genomic sequence for GCSC1pro::GCSC1-eGFP-3’UTR construct
p1301-eGFP F3	ggtggaggcggttcaATGGTGAGCAAGGGCGAGGAG	Amplify eGFP for GCSC1pro::GCSC1-eGFP-3’UTR construct
p1301-eGFP R3	TTACTTGTACAGCTCGTCCATGCCGAGAGTGATCCC	Amplify eGFP for GCSC1pro::GCSC1-eGFP-3’UTR construct
p1301-GCSC1 3'UTR F4	GAGCTGTACAAGTAAGAACCCTTGCAGTTTTACAATCAGAG	Amplify GCSC1 3'UTR for GCSC1pro::GCSC1-eGFP-3’UTR construct
p1301-GCSC1 3'UTR R4	ACGACGGCCAGTGCCAAGCTTATATGTCTTGTTTCTGTTATGTTTTAGTTC	Amplify GCSC1 3'UTR for GCSC1pro::GCSC1-eGFP-3’UTR construct
pUN1301 GCSC1 F1	TCTAGAGGATCCCCGGGTACCATGGAGGCGGCGGCG	Amplify GCSC1 CDS for Ubi::GCSC1-eGFP construct
pUN1301 GCSC1 R1	tgaaccgcctccaccCTGTTGAGATCCAGAATCAGG	Amplify GCSC1 CDS for Ubi::GCSC1-eGFP construct
pUN1301 eGFP F2	ggtggaggcggttcaATGGTGAGCAAGGGCGAG	Amplify eGFP for Ubi::GCSC1-eGFP construct
pUN1301 eGFP R2	CGATCGGGGAAATTCGAGCTCTTACTTGTACAGCTCGTCCATGCC	Amplify eGFP for Ubi::GCSC1-eGFP construct
YES2 GCSC1 F	GGGGTACC ATGGAGGCGGCGGCG	Amplify GCSC1 CDS for functional analysis in yeast
YES2 GCSC1 R	GCTCTAGA TCACTGTTGAGATCCAGAATCAGG	Amplify GCSC1 CDS for functional analysis in yeast
pTrcHis2A GCSC1 F	ATAAACCATGGATCCGAGCTCATGGAGGCGGCGGCGGCG	Amplify GCSC1 CDS for transport assays in everted membrane vesicles
pTrcHis2A GCSC1 R	TTCGAATTCCCATATGGTACCCTGTTGAGATCCAGAATCAGG	Amplify GCSC1 CDS for transport assays in everted membrane vesicles
pGH19 GCSC1 F	AGATCAATTCCCCGGGGATCCATGGAGGCGGCGGCGGCG	Amplify GCSC1 CDS for subcellular localization in X. laevis oocytes
pGH19 GCSC1 R	CCATGATATCTCGAGAAGCTTCCTGTTGAGATCCAGAATCAGG	Amplify GCSC1 CDS for subcellular localization in X. laevis oocytes
pT7Ts GCSC1 F	ACGCTCAACTTTGGCAGATCTATGGAGGCGGCGGCG	Amplify GCSC1 CDS for electrophysiological analysis in X. laevis oocytes
pT7Ts GCSC1 R	AGATCCTAGTCAGTCACTAGTTCACTGTTGAGATCCAGAATCAGG	Amplify GCSC1 CDS for electrophysiological analysis in X. laevis oocytes
pT7Ts AtCNGC14 F	ACGCTCAACTTTGGCAGATCT ATGATTCGTTTCTTGATCTTATTTTT	Amplify AtCNGC14 CDS for electrophysiological analysis in X. laevis oocytes
pT7Ts AtCNGC14 R	AGATCCTAGTCAGTCACTAGT TCAATCATCCACTGAGAAATCCG	Amplify AtCNGC14 CDS for electrophysiological analysis in X. laevis oocytes
pBT3-SUC GCSC1 F	ATTAACAAGGCCATTACGGCCGCGAGGCCACTCCTCGCCGGCTTC	Amplify GCSC1 CDS for yeast two-hybrid assay
pBT3-SUC GCSC1 R	AACTGATTGGCCGAGGCGGCCCCCTGTTGAGATCCAGAATCAGGTTCTTC	Amplify GCSC1 CDS for yeast two-hybrid assay
pPR3 GCSC1 F	ATTAACAAGGCCATTACGGCC ATGGAGGCGGCGGCGGCG	Amplify GCSC1 CDS for yeast two-hybrid assay
pPR3 GCSC1 R	AACTGATTGGCCGAGGCGGCC TCACTGTTGAGATCCAGAATCAGGTTCTTC	Amplify GCSC1 CDS for yeast two-hybrid assay
pUN1301 GCSC1-HA-nYFP F1	TCTAGAGGATCCCCGGGTACCATGGAGGCGGCGGCGGCG	Amplify GCSC1 CDS for bimolecular fluorescence complementation assay
pUN1301 GCSC1-HA-nYFP R1	ATCATAAGGATACATCTGTTGAGATCCAGAATCAGG	Amplify GCSC1 CDS for bimolecular fluorescence complementation assay
pUN1301 GCSC1-HA-nYFP F2	ATGTATCCTTATGATGTTCCTGATTATGCT	Amplify nYFP for bimolecular fluorescence complementation assay
pUN1301 GCSC1-HA-nYFP R2	CGATCGGGGAAATTCGAGCTCTCAGGCCATGATATAGACGTTG	Amplify nYFP for bimolecular fluorescence complementation assay
pUN1301 HA-nYFP F1	TCTAGAGGATCCCCGGGTACCATGTATCCTTATGATGTTCCTGATTATGCT	Amplify nYFP for bimolecular fluorescence complementation assay
pUN1301 HA-nYFP R1	CGATCGGGGAAATTCGAGCTCTCAGGCCATGATATAGACGTTG	Amplify nYFP for bimolecular fluorescence complementation assay
pUN1301 GCSC1-MYC-cYFP F1	TCTAGAGGATCCCCGGGTACCATGGAGGCGGCGGCGGCG	Amplify GCSC1 CDS for bimolecular fluorescence complementation assay
pUN1301 GCSC1-MYC-cYFP R1	AAGCTTCTGTTCCATCTGTTGAGATCCAGAATCAGG	Amplify GCSC1 CDS for bimolecular fluorescence complementation assay
pUN1301 GCSC1-MYC-cYFP F2	ATGGAACAGAAGCTTATCTCAGAGG	Amplify cYFP for bimolecular fluorescence complementation assay
pUN1301 GCSC1-MYC-cYFP R2	CGATCGGGGAAATTCGAGCTCCTACTTGTACAGCTCGTCCATGC	Amplify cYFP for bimolecular fluorescence complementation assay
pUN1301 MYC-cYFP F1	TCTAGAGGATCCCCGGGTACCATGGAACAGAAGCTTATCTCAGAGG	Amplify cYFP for bimolecular fluorescence complementation assay
pUN1301 MYC-cYFP R1	CGATCGGGGAAATTCGAGCTCCTACTTGTACAGCTCGTCCATGC	Amplify cYFP for bimolecular fluorescence complementation assay
pYES2 GCSC1-H3 R2	CACCTGCACCGTATTCTTC	Amplify GCSC1 CDS for haplotype analysis
pYES2 GCSC1-H3 F2	GAAGAATACGGTGCAGGTG	Amplify GCSC1 CDS for haplotype analysis
pYES2 GCSC1-H4 R2	CGGAGAAGGGAGAGGAGGAGGAGGAGGAGGAGGAGAT	Amplify GCSC1 CDS for haplotype analysis
pYES2 GCSC1-H4 F2	ATCTCCTCCTCCTCCTCCTCCTCCTCTCCCTTCTCCG	Amplify GCSC1 CDS for haplotype analysis
Primers for expression
qPCR GCSC1 F	GAGGTTACTTCTGCCACAGTCG	Primers for qRT-PCR
qPCR GCSC1 R	GACTGAAATCCGCAAGTGCTC	Primers for qRT-PCR
Actin F	GACTCTGGTGATGGTGTCAGC	Primers for qRT-PCR
Actin R	GGCTGGAAGAGGACCTCAGG	Primers for qRT-PCR
OsCCA1 F	CAGATAAGGCCGACACCAAAC	Primers for qRT-PCR
OsCCA1 R	GGTGTGTTGGAACCACATG	Primers for qRT-PCR
OsPRR1 F	CTGCTGAACCTCTGGACCCA	Primers for qRT-PCR
OsPRR1 R	GGTTCCGATAACGCCAACTC	Primers for qRT-PCR
Primers for genotyping of USDA rice core collection
Del58 F	AAAGGACAAAAATACCCTTCCAC	PCR marker for genotyping the 58-bp deletion in the promoter region (Del58)
Del58 R	CCCCTACCGTTCTTGCTG	PCR marker for genotyping the 58-bp deletion in the promoter region (Del58)
Del16 F	AGTTCTACTTTTACCAAGCCATCCA	PCR marker for genotyping the 16-bp deletion in the promoter region (Del16)
Del16 R	TTGACATTTTAAACCGCTTTCAC	PCR marker for genotyping the 16-bp deletion in the promoter region (Del16)
